# Supplementary material for: De novo profiling of RNA viruses in Anopheles malaria vector mosquitoes from forest ecological zones in Senegal and Cambodia
Source: PubMed Central journal article supplement (PMC6702732; doi:10.1186/s12864-019-6034-1), 2019-08-20

**A**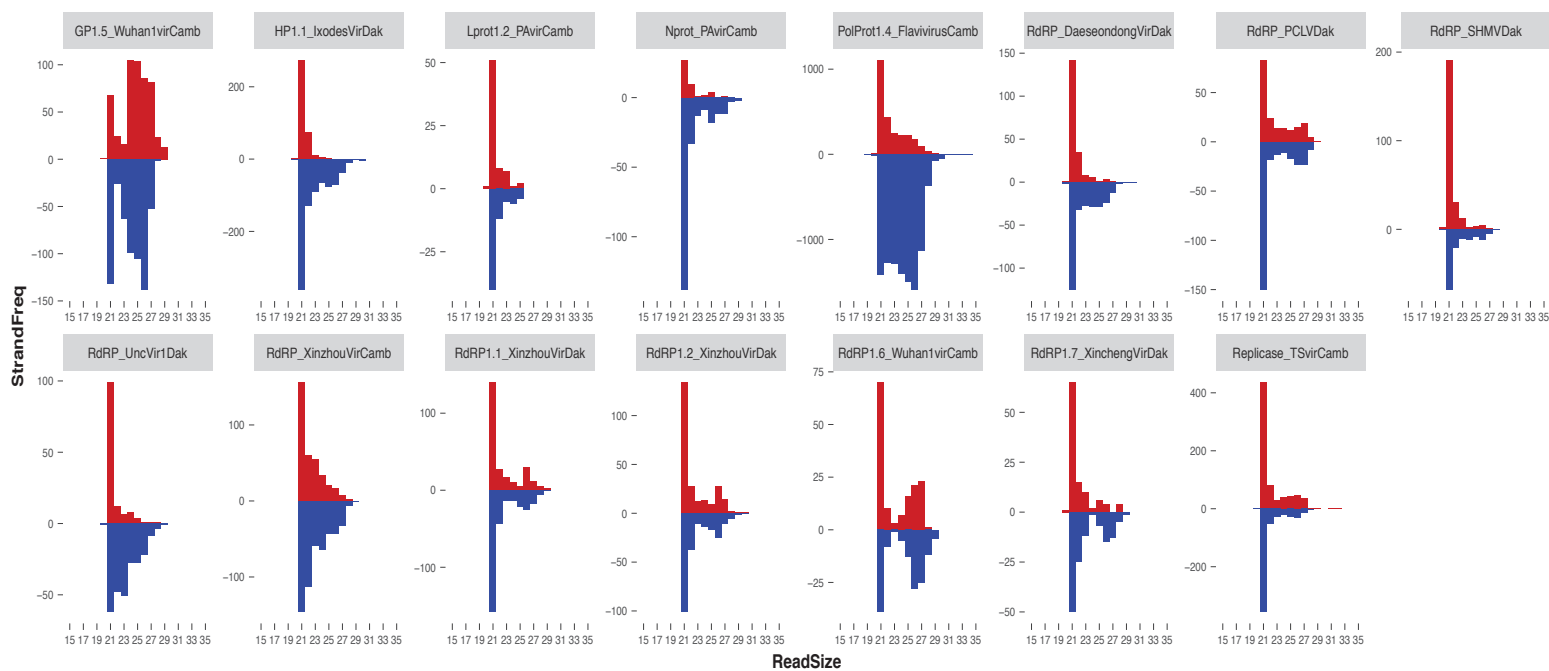**B**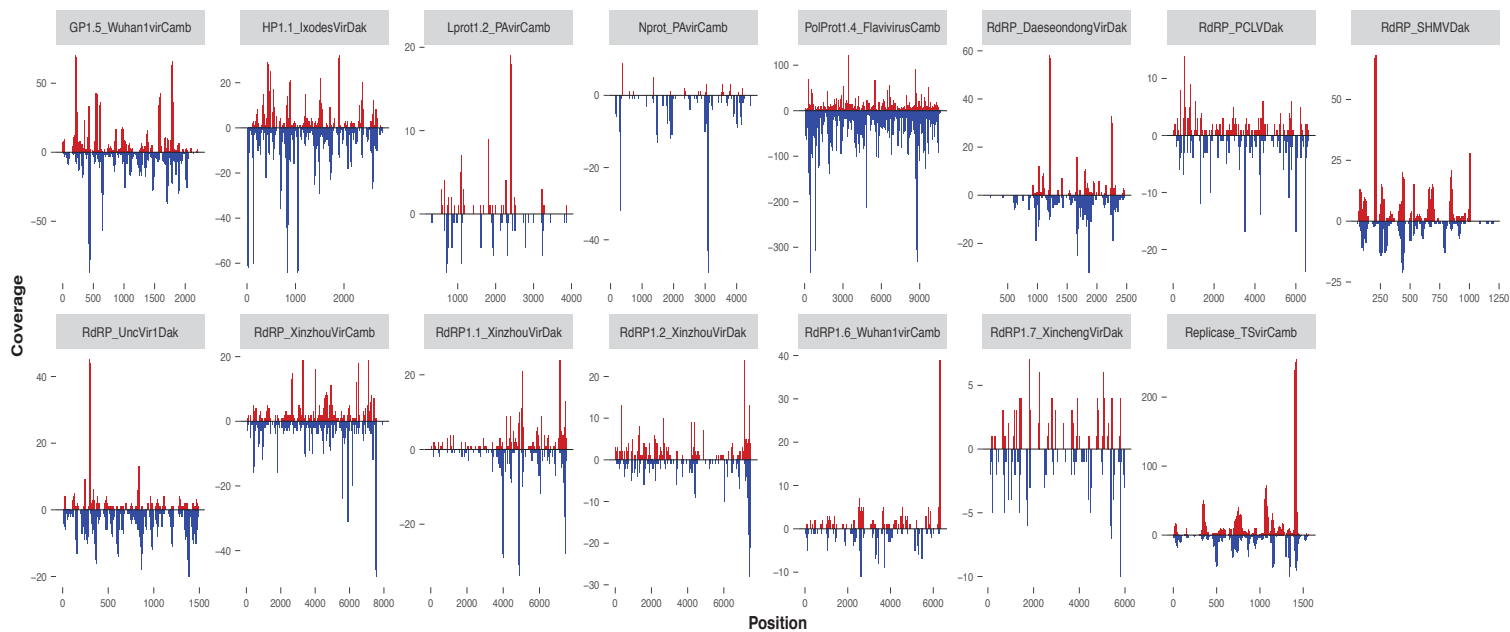

Supplement: 12864_2019_6034_MOESM4_ESM.pdf [file 12864_2019_6034_MOESM4_ESM.pdf]
