# Supplementary material for: De novo profiling of RNA viruses in Anopheles malaria vector mosquitoes from forest ecological zones in Senegal and Cambodia
Source: BMC Genomics. 2019 Aug 20;20:664. doi: 10.1186/s12864-019-6034-1 (PMC6702732; doi:10.1186/s12864-019-6034-1)
Supplement: Supplementary file 8 — Unclassified Virus Sequences. Sequence assemblies for 39 non-redundant contigs > 500 nucleotides, unclassified by sequence similarity to known viruses. The small RNA profile matched a pattern of classic RNAi processing of viral replication intermediates, suggesting they are undescribed viruses. In fasta text sequence file format. (FASTA 38 kb) [file 12864_2019_6034_MOESM8_ESM.fasta]

>cambTR100037_c0_g1_i1
TGGTTATACTCTTTGATGATGTATATCACGTCGATGATGACTTACGTGCCGGTTTAAATATTCCTACATTGACGAATTTGATTGGCAAGTTACCATTAGTCATGTCGAAACAAGGATCTTTATTCATGAGGGTGTTTATCGGTCTTGATAATACATACGACACTATTTTGACAATGCTCTCAACTTATTTCATGGACGTCAAGCTCATTAAACATGGAGATTCAGTTTTCAACTCCGAACATATTTTCATCGGATGCGATTATGACATCGAAAAAAGAAACGAACACACTATTGATATACCTGCAGCTATTGAATCACAGACACAAATCATTGAATCATTGTGTGACATATATACGCGCAGACCGGGTATTAAAGTTTTAACTAAAAAGTGTCCCATTGGTATATATAATTGCAATGATGGTGGTGATATTATACTTGATACAGTATCATCAATTCCATCGTGGATGAAAGATATCGTAGGTTGTAATGACTTGCTATCATTATTGGCTATACACCGTTTCAATAATATTGGTATATCCTTCTCTGTCCGCTCTAACAATTAC
>cambTR100037_c4_g1_i1
CTGATCTGTTCGTTAAATGGCCCGATCTAGTCTCTATCGTCGTTAATACCGCTAAGAAATTTTCTGGTAAACTCACGAATAAAGATTTTTCTCGTCTATTTACGTTGGCTGATCGATCTATAAAATTACATACTACTTGCAATTATGTTTTTGAAATTCGTGGACAATCGGAGAAAGGTGCTAAAATAATTACTATCGCTATGCAAGGACCTGCAAGCGTTAACAATAATTTTATCGACGACACACTTAACGATATTATTGCCGCAGTAGAACTTATTGGCGCTCAACAGGTAATACCACAAACTCTCCCTAACGGAAAATTCTTTTTAACAAAAGTTAAATTAAATAAAACAACAAATGAATCGACAGTAGTCAGTGATAAGAACTCTCCAAGTTTATTCAGTGACGCTGTAAAAATTGGGCTTTCAAGTGGCTCCTCCAAATCTTAACATACTACACTTTATCATTAATTCATTATCATTTTGTTTCAATGGTCCGGTTGATACGTTTTCGCGAACGTATC
>cambTR116310_c0_g3_i1
GGGAGGACATCATGAGAGTGTACAATGGATTTGGTCAAAGTATTGATAATGAGTTTGATATTTTTCATGTAAGATGAAAAAACAGTGAAAGAAACGTGACTGTATATTCACTTTGCAGCGCATGGAAATATTTATAAAAACGTTGGAAAATACCCAGCTCAACGAAGCTCATGAAATATCAGCACGATTCGGGAAGGAGACAATCACTTCCATCACTGCGCCATCTTCGTACCGCACAAGCTTCGAAGAATCGTGGTTGTGGCATAATACGACCCTAGGTATCGTTCGGCTTCTTTCTTGTTTTAGGTGGTTTAAATTTTGAGGATCATTTCATTATTAAGAGCGCAAGTAGCTTTCAATAGCTCCCAGCATTTGTGTAACTACCACATCCTATTGTCTCTTTTTCGTTCTCGTCTTCGTGCCTTCTCGTTTTTCTCGTCTCCTTCCCGTAATGTTAGAATTAAGCTACATGATTTAGCCTATGAGGCAGTCCATGATTTTGTAACAAGCAATAGATAACCATTTTGATTTTACTTTCTCCTTAAACTCCTTTCTACGCTCGTGTCTTTTCATCAATTCTTCCTTCTTGGTGTTATTCTTTAAGAAGTTTTTTTTTCTTATTCTCGTGATAAACAGTTATTTTGTTATTTTAGATGTAAGCTAATTTTATACACGGTTGAAAGTTGCAGCGAAGTCAATGTCCATTGCGTCGTAAAGGGAAGTATTGTTCGCTACAGTCGCTACAATACCTTTCGCCATTGGACTCGTTTTCCTATCATCGGTGAATTCCAGAGCATAGATGTTCTGCTCGTTCGGTGTTATGATGCCATCCGTTCGTTGCTCGTAACGTTCAATTCAACGCTGGAAGTACAGAAGAAGACTTTTTGCTTATACATGCTCATTAAACATGTTCTTTACTACATTCTACTCACGGAGATTTCAGTTCCAGTATGATGTACGAATTTGTCACATTTTCCATGTCGCTGACTTGCTCGTGAAAATAAAATCCATCATCGTGAAAAAAAAGCGTATGCACATGTATTCTGTGCTGTCGTTTGGATTTAGATTCAGTTTGATGCAACCCTCATCGTCACCAA
>cambTR117230_c3_g3_i4
TAAGCGCTAGCCGAGACCTTTCTAAAACGGTGCCACATAGCCCGAACCGTTGGGTACAGCCCGAGCTATTCGAGGTTTGCTTGTGCTTAGGGAATAGGGAACCTCTTTATGTGCACACTTTGGTGCACCGATATTGGGCATTTGGGTTACTCCGATCTCTTCGCTTTGTTCTGGCCAAAGTTTGGCCACTTAATGGAGAACTTATAATTGTTCTACACCATACCGGTAGCATGCACCTGCAGCTTGCTATTTAGGGACTTAGGGTGATTTTTGGCCTTTGTGGTAACTTTTTCCAACTTTGTCGCTTAATAACATCCATGTGGTAACTTGTAGCGCCTAGCTTGGTAGGAAACATAGCTAGCGCTGCTCAATGCCTTTCCAAAACAGTTTCATTCGAGCCGATCCGATATCTGTGGCCGAAGTTATTAGCGGTTCCGTGTTTCATGTCGCCTTGTATGCCCCTTATTGCGCTTATATGGCGAATCTTGGATCACCCATATCACCCCTTTGTATATCTCTGATCGCTTTGCTGTATATGGGTGAAAGTTAGGGCTTAAGCTGAACTACTTATGATTGTTCCACACCGGGAACCTATCTCGTACCGCCTGCTCGGTACATTGGGACTTAGAGTGATTTTTGGCCTTCGTGGTAACTTTTTTCGACTTTGCCCCTTATAAACTCACTTTTAGATACCAGCTAGCGCTTTGCTTGGTAGGAGACATAGTAAGCGCTAGCCGAGACCTTTCTCAAACTGTGCCATATAGCCCGATCCGTTTGATACAGCCGGAGCTATTAATGATTCCGTGTTTCATATGGTTTCTTGAACCCTGTACTTGGCCAACTTTGTACCGGCCATATCGCCGACTTGGGTAACTCTGATCGTGTTGCAGTATATGGGCCAAATTTAGGTCTTGTGGTAACGTACTTATAATTGTTCAACAGCCAAGCCGTAGCTCTTACTGCCTGACCGGTATTTTAGGATATATGGTGATTTTTGCCCTTCGTGGTAACTTTGTTCGAC
>cambTR125131_c0_g1_i1
CCGTCGAGTATACCCCTGACGATAAGATGAATGTTTATCTTAATGATTACACAACAATTTTTGCCATATGTCATAATTTTGCTCGTGACACTGGACAAGTATTGCCATATAATACTATTCCCGCTCCTAATATTGACCTTCCTAATTCATGGTTTTACACTGTTTACGATAAAGTTAACTCTGTTAATTACATCCTCAGTTTACCATCTTACTTGCCTGCAATGAAAGGCAATTACATCACTGATCGCGGTTTATTCTCACCTATTGTCCCAGGTTACGCTACTAAAACTGATGATAATACATATGTTAATATAACTCGCGTCAAACCATCATTTAGGTCCAATTTCTTGCTATACGAGTTTTACAATATAGTATGGGGCACTCACGTTCAACCATACAGTTCGTTAATTGTTTCGTCACAAACTGACACTGTAAAATGTTCTAACGGTGATTTTACTCGTCTTTTTATGCTTGTACCATCTACTCTTTTTTCTAATTTCACTACTCCAATTGTTATATCCGATATTGACTTAAAAGTTGCTTCATCTACCTATCGCGCAATTGACTTAATTTCTCGTGCACCAATCACATATGGCTCATTAGCTTTCACATTGCGTCATATTTATACCGGTATTATAGATGCAAACACATTCATATGTAATACAAAAAATTCAACACTTTACCGTGCGACTGTTGTCTTATCTTGTAATGGTTTAT
>cambTR128767_c0_g1_i1
CGAGAGGTCACCAAACTCATCCTGACGCCAGTCTGCTTGTTTCATCTTTCTCCCTAGTAGTTCTATCCTGCACTGGGGAGAAGTCTTGCTGGGCTGAGGTATACTTACAAACATATTTTAGGGCTTCGCCCATATATTATATTAGGTAAGTACCTAGCCAGTCCAAGAGCACTCTCCACCGCGGCAATGGAAGAAAAGGGATCGATGCTTCACAGCGGCAAGTCGGCAATGGACCTGTTGGCTTCTCCTCGGTGATTTCGGATATGTCCAGCCCGTACTTTTGTACAAAGGACACTGATGATAGGCCTTGGCAGGCCTTGAAATCCAGGAGGGGAATTGATATTTTTCCCTCGGGAAAGAATATTTTACCCCCCTCAGGGTTTTCATCGGCTGCCAGACCGAATCATCAGGATCCTTCGGTCCTAAGACCAGGCTGGACCTAACCCATCATCCTCGAGAGGTCACCAAACTCATCCTGACGCCAGTCTGCTTGTTTCATCTTTCTCCCTAGTAGTTCTATCCTGCACTGGGGAGAAGTCTTGCTGGGCTGAGGTATACTTACAAACATATTTTAGGGCTTCGCCCATATATTATATTAGGTAAGTACCTAGCCAGTCCAAGAGCACTCTCCACCGCGGCAATGGAAGAAAAGGGATCGATGCTTCACAGCGGCAAGTCGGCAATGGACCTGTTGGCTTCTCCTCGGTGATTTCGGATATGTCCAGCCCGTACTTTTGTACAAAGGACACTGATGATAGGCCTTGGCAGGCCTTGAAATCCAGGAGGGGAATTGATATTTTTCCCTCGGGAAAGAATATTTTACCCCCCTCAGGGTTTTCATCGGCTGCCAGACCGAATCATCAGGATCCTTCGGTCCTAAGACCAGGCTGGACCTAACCCATCATCCTCGAGAGGTCACCAAACTCATCCT
>cambTR14567_c0_g1_i1
AAGGAAAGCTTACTAGACCCCATTGGCGCTTAATTTCGCTTAAGCTGGCGGGGAGTCGAACCCGACTACTAGACTTCGTAGTCTAGCCGACCAAGGTACGTTAGTACCATCCGGGTCGCTGTAGTAAGTTAAAATTTTGTTATAATAATGTGTAGTATGTTAAATTTTGGTGGAGCCACATTGGACTCAATTGATTAGAAAAAGTGTACAGAACGAGACTCGGTAGTGCACTGAGAAGTTCACTCCGAGAATCATCCTCGAATGTGCCCGCCGTGAACGCGGTGCCAATCGTAGTATTGTTGTTTGGTATTGCGCATTCTCGAGATTGTTCACGGAAATCTCGAAGAATGAATTACACAGTGTAGTTTCAACCGGTAAATGTGCTATTGTAATTTTATTGTAAATTTTGCCATAGTTATGAAATGAAAATACCTATATTTGATACAAAGCCAAATAGTAGTACGTCATTTCATATATTAATTTGATTGTTAAGGACATTTAATTTTGATATTTGCAGAGGTTTGTTACGAATTTGTTTTGAATTTTGCAATGTTCAGGAAAGGAATATACGACGATGTTTGATACAAAGCCAAAATCGTGGTATATTATTAACTGAAAATTGTTGTGAAATTCATCGTAATTATGTATTCAGATTGTTAATGACTTTAGATTATTGTTTTGCGGCCATTCGTTTACATGTGAATTTGATTTTAAGGACATTTTAATTTTGAAATTCTAATTCTGAAATTTTCGGCGATTTGTGACGAAATTGTTTTGAATTTTGCAATGTTCAGGAAATGAATACACGACGATGTTTGATACAAAGCCAAAATCGTGGTATGTTATTAACTGAAAATTGCTGTGAAATTCATCACAAAATGTCATAACGCGGTGTTTATGGAACCCGGTTAAATCGCAATTTATTGTCTGTTCGTTGTATTAATTTTGTGTTGATTCATGTATGTTCATAGAAATTTAGCTTGTATTAATTTTGTGTTGATTCATGTATGTTCATAGAAATTTAGCTTGTTATTAGAATGTTACTAAAAGATTGAATACGCCTATCGTGAACATAGGGTGATTCGTCGCTATTGTTATGATATGCATAATTGAGATTGTTCACGAAATCTCTAATTATTTGTGACGGTACTTTCAAGTGTTTCTAGATTTTGTTGTATTGACGATTTTATGTCATTTCTATGAACATTATGATCAAAATTGTAATGGATGAGTGTGTCCTTTCACTCGTCTCATTATTGATCTTATTAGTTGATATATAATGGCTTGATTTAGAAGTTATTGTTTATTAGTGTTGCGTTCCTGAAAAGGAACATACAACTATGTTTAATACTGAAAAGCAAAACATAGTGGTATAATTATGTATGCTGAAAAGCCAATTGTATTGTTTTACTTTCCTTAAAAGGAAAGCTTACTAGACCCCATCACGAGTCAGTAAGATTGGTA
>cambTR14567_c0_g1_i2
AAGGAAAGCTTACTAGACCCCATTGGCGCTTAATTTCGCTTAAGCTGGCGGGGAGTCGAACCCGACTACTAGACTTCGTAGTCTAGCCGACCAAGGTACGTTAGTACCATCCGGGTCGCTGTAGTAAGTTAAAATTTTGTTATAATAATGTGTAGTATGTTAAATTTTGGTGGAGCCACATTGGACTCAATTGATTAGAAAAAGTGTACAGAACGAGACTCGGTAGTGCACTGAGAAGTTCACTCCGAGAATCATCCTCGAATGTGCCCGCCGTGAACGCGGTGCCAATCGTAGTATTGTTGTTTGGTATTGCGCATTCTCGAGATTGTTCACGGAAATCTCGAAGAATGAATTACACAGTGTAGTTTCGACCGGTAATTGTGCTATTGTAATTTTATTGTAAATTTTGCCATAGTTATGAAATGAAAATACCTATATTTGATACAAAGCCAAATAGTGGTATGTCATTTCACATGTGAATTTGATTGTATAGGACATTTAATTTTGAAATTTGCGTAGATTTATTACGAATTTGTTTTGAATTTTGCAATGTTCAGGAAATGAATACACGACGATGTTTGATACAAAGCCAAAATCGTGGTATGTTATTAACTGAAATTTGCTGTGAAATTCATCACAAAATGTCATAACGCGGTGTTTATGGAACCGGTTAAATGGCAATTCATTGGTTTTGTTGAATCATGTTAGTTGGTTGTATTATTTTGTGTTGATTCATATATGTTCATAGAAAATTTAGCTTGTTGTTAGAGTGTTACTAAAACATTGAATACGCCTATCGTGAACATAGGGTGATTCGTCGCTATTGTTATTGTGTGCATAATTGAGATCGTTCACGAAATCTCCAATTATTTGTAACGCGGTGTTGATGGAACCGGTTAAATGGCATTCTATTTGTTTATGTTGAATCATGTTTGTTTGTTGTTTTAATTCGTGTTAATTCATGTATGTTCATAGTAAATTTAGCTTGTTATTAGAGTGTTACTAATACATTGAATACGCCTATCGTGAA
>cambTR14567_c0_g1_i3
AAGGAAAGCTTACTAGACCCCATTGGCGCTTAATTTCGCTTAAGCTGGCGGGGAGTCGAACCCGACTACTAGACTTCGTAGTCTAGCCGACCAAGGTACGTTAGTACCATCCGGGTCGCTGTAGTAAGTTAAAATTTTGTTATAATAATGTGTAGTATGTTAAATTTTGGTGGAGCCACATTGGACTCAATTGATTAGAAAAAGTGTACAGAACGAGACTCGGTAGTGCACTGAGAAGTTCACTCCGAGAATCATCCTCGAATGTGCCCGCCGTGAACGCGGTGCCAATCGTAGTATTGTTGTTTGGTATTGCGCATTCTCGAGATTGTTCACGGAAATCTCGAAGAATGAATTACACAGTGTAGTTTCGACCGGTAATTGTGCTATTGTAATTTTATTGTAAATTTTGCCATAGTTATGAAATGAAAATACCTATATTTGATACAAAGCCAAATAGTGGTATGTCATTTCACATGTGAATTTGATTGTATAGGACATTTAATTTTGAAATTTGCGTAGATTTATTACGAATTTGTTTTGAATTTTGCAATGTTCAGGAAAGGAATATACGACGATGTTTGATACAAAGCCAAAATCGTGGTATATTATTAACTGAAAATTGTTGTGAAATTCATCGTAATTATGTATTCAGATTGTTAATGACTTTAGATTATTGTTTTGCGGCCATTCGTTTACATGTGAATTTGATTTTAAGGACATTTTAATTTTGAAATTCTAATTCTGAAATTTTCGGCGATTTGTGACGAAATTGTTTTGAATTTTGCAATGTTCAGGAAATGAATACACGACGATGTTTGATACAAAGCCAAAATCGTGGTATGTTATTAACTGAAAATTGCTGTGAAATTCATCACAAAATGTCATAACGCGGTGTTTATGGAACCCGGTTAAATCGCAATTTATTGTCTGTTCGTTGTATTAATTTTGTGTTGATTCATGTATGTTCATAGAAATTTAGCTTGTATTAATTTTGTGTTGATTCATGTATGTTCATAGAAATTTAGCTTGTTATTAGAATGTTACTAAAAGATTGAATACGCCTATCGTGAACATAGGGTGATTCGTCGCTATTGTTATTGTGTGCATAATTGAGATCGTTCACGAAATCTCCAATTATTTGTAACGCGGTGTTGATGGAACCGGTTAAATGGCATTCTATTTGTTTATGTTGAATCATGTTTGTTTGTTGTTTTAATTCGTGTTAATTCATGTATGTTCATAGTAAATTTAGCTTGTTATTAGAGTGTTACTAATACATTGAATACGCCTATCGTGAA
>cambTR14567_c0_g1_i5
AAATCTCCAATTATTTGTAACGCGGTGTTGATGGAACCGGTTAAATGGCATTCTATTTGTTTATGTTGAATCATGTTTGTTTGTTGTTTTAATTCGTGTTAATTCATGTATGTTCATAGTAAATTTAGCTTGTTATTAGAGTGTTACTAATACATTGAATACGCCTATCGTGAACATAGGGTGATTCGTCGCTATTGTTATGATATGCATAATTGAGATTGTTCACGAAATCTCTAATTATTTGTGACGGTACTTTCAAGTGTTTCTAGATTTTGTTGTATTGACGATTTTATGTCATTTCTATGAACATTATGATCAAAATTGTAATGGATGAGTGTGTCCTTTCACTCGTCTCATTATTGATCTTATTAGTTGATATATAATGGCTTGATTTAGAAGTTATTGTTTATTAGTGTTGCGTTCCTGAAAAGGAACATACAACTATGTTTAATACTGAAAAGCAAAACATAGTGGTATAATTATGTATGCTGAAAAGCCAATTGTATTGTTTTACTTTCCTTAAAAGGAAAGCTTACTAGACCCCATCACGAGTCAGTAAGATTGGTA
>cambTR23099_c0_g2_i1
TTGATTACATCGGTACAGCTAACCTTATCCCCGTATCTGCCAAATACTTATCTTTACTCAAACGTACCATCGCAGTCACTTCCACTGGTAAATATACCGGTACAATTGCTTTTAATTCACCACCCGATCCCACTGTCGACCTTTCTATTTGCTTTGGTGCTAATTCCGTATGTGTGAAACCTAAGTCCACCAACTTCCTTACACCACCGCAGGGAGCCGTCCAAGATCCGGATACTACATCATGCTCAGGTGTTGATCCGTCTTTCTTTTCTATCATTCTCACGAACGCGGGGCTTATGGCGATTGCTGTTATCATGATAATTCTTGATATTGTGATTGGCATAAGCATACTTTTGGTTCTTCTACGCGTAATTCCTAAGACTTTCATCATGTTGACATTACTCACTGCGCGCAAAACCGTTGCATTTAGTGTCACTTCAGCCCCGATCTCTAATTTATCACAATTAGATTCTTTTTCCGGCACTCTTATGAGTTATAGTAATTATAAAGCTGATGATTATCAGTGCCAAGGTGCGGCTTGTAATCAATATTCTTACTTAACGACTATTCCAAAGCCTACTCAGTACACTCCTGATGAGCAAATCAACCTTTATCTCAAAGATTATACTAAATCATATGCAATTTGTCATACTTTCCGACGAG
>cambTR29726_c0_g1_i1
GTGCATATATGTGTGCAATAACGATAATTTTGTAAAGCGAAAGTCCCTAATACGTGAAAAGTGCGTAATCATAGCTGAGTTTGAACATTCAGCCTCGACCACAATATTCGTTCGCTCAGACTATGCTGTGATCGTCGTCACAAAACTTCATCATAATTACATGGATTGTCTGCGAGAAGAAATTGGCGTCCCTAAGGATTTACTCGTGCAAATTTCGTGTGGTAATAACACCAGTGTACGCGACGATATGATTGCTAAAACAAAAGGAAAATACAGTTTCAGCGGGCGTGGTACTACCGTGATCCCTAATAAAGAACATGCTATTCTCGGGTATATTAAACCGCTTTCCGTACCGACTGGTGATGGTATATTACAACAATATCTTAAATCCGTAACTGAAAAGTTGGAAATTGAAAAATTAAATTTGGAAAATGTGATGTCACAAGCCACGGCATTGTGGAATTCCGCAATTACATCGAGAAATTATGTTTTCCCACGGTCTGTAACCGCCAAGACTGGTGCATGGTTGTGGAAGAAGACTGGCGATGCGGAACAATTCATTGGAAAACCGAATTGTCAATCCTATATGTACGCTTTCACCGGTAAGGAATTGGTAGCGGTGAATGTTGATGTGATATACAAAAATGGAGAACGTCATTTGTATGTTATCAAGGGTGACATCAAAACACCATTTGTCGCGAATGCCACAGACG
>cambTR39542_c0_g6_i1
TGTTCACGATAGGCGTATTCAATGTATTAGTAACACTCTAATAACAAGCTAAATTTACTATGAACATACATGAATTAACACGAATTAAAACAACAAACAAACATGATTCAACATAAACAAATAGAATGCCATTTAACCGGTTCCATCAACACCGCGTTACAAATAATTGGAGATTTCGTGAACGATCTCAATTATGCACACAATAACAATAGCGACGAATCACCCTATGTTCACGATAGGCGTATTCAATCTTTTAGTAACATTCTAATAACAAGCTAAATTTCTATGAACATACATGAATCAACACAAAATTAATACAAGCTAAATTTCTATGAACATACATGAATCAACACAAAATTAATACAACGAACAGACAATAAATTGCGATTTAACCGGGTTCCATAAACACCGCGTTATGACATTTTGTGATGAATTTCACAGCAATTTTCAGTTAATAACATACCACGATTTTGGCTTTGTATCAAACATCGTCGTGTATTCATTTCCTGAACATTGCAAAATTCAAAACAATTTCGTCACAAATCGCCGAAAATTTCAGAATTAGAATTTCAAAATTAAAATGTCCTTAAAATCAAATTCACATGTAAACGAATGGCCGCAAAACAATAATCTAAAGTCATTAACAATCTGAATACATAATTACGATGAATTTCACAACAATTTTCAGTTAATAATATACCACGATTTTGGCTTTGTATCAAACATCGTCGTATATTCCTTTCCTGAACATTGCAAAATTCAAAACAAATTCGTAACAAACCTCTGCAAATATCAAAATTAAATGTCCTTAACAATCAAATTAATATATGAAATGACGTACTACTATTTGGCTTTGTATCAAATATAGGTATTTTCATTTCATAACTATGGC
>cambTR39542_c0_g7_i1
CTCGTGATGGGGTCTAGTAAGCTTTCCTTTTAAGGAAAGTAAAACAATACAATTGGCTTTTCAGCATACATAATTATACCACTATGTTTTGCTTTTCAGTATTAAACATAGTTGTATGTTCCTTTTCAGGAACGCAACACTAATAAACAATAACTTCTAAATCAAGCCATTATATATCAACTAATAAGATCAATAATGAGACGAGTGAAAGGACACACTCATCCATTACAATTTTGATCATAATGTTCATAGAAATGACATAAAATCGTCAATACAACAAAATCTAGAAACACTTGAAAGTACCGTCACAAATAATTAGAGATTTCGTGAACAATCTCAATTATGCATATCATAACAATAGCGACGAATCACCCTATGTTCACGATAGGCGTATTCAATGTATTAGTAACACTCTAATAACAAGCTAAATTTACTATGAACATACATGAATTAACACGAATTAAAACAACAAACAAACATGATTCAACATAAACAAATAGAATGCCATTTAACCGGTTCCATCAACACCGCGTTACAAATAATTGGAGATTTCGTGAACGATCTCAATTATGCA
>cambTR48640_c0_g1_i1
CTCCTATCTACCGTGAAGCTAATTTCAGCGCGTATATCAATCGCGCATCTTATCAATCCGGTAATTATGAAGTCGAATGTGATCTTGTTATTTACCCCAACAAACAATTACATTACGATCAACTGGGAACTCTTAAACAATATTGCAGTCCTCTACTTATTTCGCAAAAGACTTCGAAACCTTACATTCACGTGATAACTGATTTGGGCGTTACATTTCCAAAACGTCGACCATTGAAAACAAAATTTTCGTGTACTTACTCTCACCATGTCGCTGAAGATGATCGTATTAACATGATTCGTTCGGAAATGTTCTGCGCATTAAGTAAGTCCGGTTTGCAGTTGTATAGTACAATTTGCACTGACGTTGCTGATAGAATCGTTAAGTGCGTCGAACTTGCTACTCATCAGTCTTACTATGTTAATTGAACATTATAATTAATCAACAATGATTCGATCAAGAAGTACTCAACAATTGGCTCGTAATGATGCGAACAAACCGCGAAAACCGCT
>cambTR48725_c0_g1_i1
CCTCGACGATCGTTGTGTAAGATTGCTGATTACACACAACCACGAATTAATAAAATTTTTCAACGAATTAAATCCGTTTACCCTGGTTCACAGAGTGATTGTGTCCCACGTCATAAATCATGGATCGGTCTTAAAAGCGCCACCGAATTAAAATCTGCTGTTATGGAAGTCATCGCGGAAGGTTATCAGTGCTCTCACGTCATTGCACGTTACAAGCAAGTAGCCAAGCCAACGAAATGCGGTGACTCTTGTGTACTTGCGGTTAAATCTACACTTTTGAATTGTAAGTGTTTTGGTAAAGAAGTCTTTACGTGTTCGCACTGTAAGGTTGAACATGTTTACCACAGTGCCAGTCTTTGCAAGACCTGTCGCACGTTACCTGTTAATAACGTACGCCGTATTTTCGTGAAGACGTACATTGACAATGATTTTGCCTACTATACTGCTACTGTTCTTCCGAACTTCTCCTTTAAAAGTTGTGTCTTACCTGACACAAAATTTTATAACATAAACACTAGAGTTTATGTTCAACATGATAAATCTAAACTCATGAAGGACGTTGCTAGTCCTTACTTTTTCATATCTAACCATGATTTGACCAGGAATATCGACCTGCAAAGAAAATTCAAGCGTGTATTAGTCAAACCAAAAGACGTTATGAAAGCAGTCTTTCTAAAGAAATATGGGAAAAAATTTTCGAAGGTAGTTGATTCCGTGATTGCTGGAGAGTCTATCGAGTACGCGATTAGAAACTATGCCGGACCGATCACTGTTGCAACGTATGACAATCTTATGCAACGTCTCAACCCACTTAAAACGTCTGTACAAACACATGATCTACACAACACTGAAGACACAAGTACGATCCCCGAAGTGGATCCCGTTCCGATGGCTATACAAGAATCCATCAAAGCCTTACAAACATCATCCACCGATGTAAAGAAAAATTTTGATTGGCTATTTACAACAAATGAATTCATAGAAGACTCTCTCGAAGAGACTTCCTCATCATACATTCAAACTGTTGCTGCGAAGGGCGAATTCATCGAAGACGAAATCAGTCTTTCATCAGGAAAAACTGAAGAAATGTTTCCCAATATTGATGACACTATATCAACATCATCTGATGAGTCACAGGAAGCTATCGACATGTTTCCTGATGAGCAACCACTCATTCAATTTAATGACGACAACAAATCATACATTGATATCATTGCATCTGAACTACCTATTAATTCTGTATGCGAC
>cambTR52886_c0_g1_i1
GTCACCAACTGGCAACAACATCGTGGTTAGGCCCAGAATTTATTCTATGGGCATGACTGCAGCCATCCTGCGGCGTATGGTTCAGCGGAACCTCGCCCCAGGCAGCCTTATGCTGTCTATATCTCGGTCTGAACGGCGATTGCGGCAACGTGACGAGCAGGACCAGCAATGGTTATCTGACTTCGTCCGTTTTGCAGACAGTGCATTTGCACTCGCAATCAGAACTCATCTTCGTCAACTTCGAGGCGATGATGTTTTAACGCACTTGAAGACAATGGCCCGGCTATACGCGTTCCTCGCTAAGAACGAGGTTAAAAATGTCGCGTCGTGGTGGAAAGAGAACTGCTTTAGGTTACTCGATCGGTCACTACAAGCCGGTGACGAAGCGAAAAACGCTACAGGGGACAGCGAGTTCGAACAATGTTTCACTCGCAGTGCGCTTGCGGCAGCGTCAAAACGAAAAATTAAACGTGTGAGGAAGGATAGACAACGAGTAAAGAAACTCATGGGAACGCGTTCGTCGCGTCAGGCATCAAGCCTGTTTGCATCCCTCATCCGTTCCTCAGGCCTAGTGTCGTTCCGTGAAGGAATCGCCTTAGGTCTTTCTGCACGTATTTTGCCTGCACCTCTCCTCACCGAACCAATCGTTGAGGCAGAAGCTAAAAAGTTGCAGGAGCGGCTTACTGGTCGCCCGACTTTCATCCCAAAGGAAGACACGGGGATCCACCAATCAATTGGTGCGACCATGCTTAGTATCAGCAACCGTATCAAACGGTTTATCAAGGTAGAAGGGAAGAAGATACCCCTCCCAACTGATTCTAAGATCGTCAGTTCTGCCACCGATAGTGAAATTACTACTAGTCGGTGTATTGCAGATGCCGCTGAAAAGAGCAACGGGCAGTACGATACATTTATTGGTAATGTACGTACCGTAGAGTCGAAGCCACGGATAAACAAAGCCTTATACCTGCCAGAGCCAGGGTACAAGGTCCGTCTTGCTTCTATCCCGCCTTGCTCATCAATGGTCACGGCCGGCCGAGTAGTAAATCAATTACTGCTTCGGGCTCTTTCAAAGGCCTATCCAGCTCAAACATCCCTAGGGATAGGAACAACCAAGGAGTTCCTCGCTGAATTTAAAAATGACCATAAACGCCGCTGGCTATACTCTACGGACCTGTCTGCTGCAACCGATCATATCGATTCCTCCTATGCCATGAGTGCAGTTGAGGACTTGATTGCCGAAATGGTAAATCAAGGGTTTACAGCAGCAGAGTCAGTGTTCTGGGACCAGTTACCACAGATGCAAACTATGGCAGTGTGTCATCAGAACTCAAGAGAGCCATTTTTGTCTTTCCCAATGAAGAAAGGTGTGCTCATGGGCAAGCCCTTGACCTGGCCTATCCTAACAATACTGCAATTGACGGCTCTAAAGCATGCCGGTCTACTCGAACGGTCGCACATCGTCGGGGACGATGCATTAATATACGCGACTCAGGAAGAGTATGCAGATTATGTTAAGACTGCGCAGGCAATGGGTTTGAAGTTTAACCCAGATAAGACGCACCGTACTCGTCTGTATGGCATCCTCGCACAGAATGTCGTACAACTTGTCGGCAAGCCGGCAAAACGAGTAGGGAAAGACCTCCAAACTAAAGTGCGGTCGACTGAAAACACACTTTGGGCTCATATTGAACAGGCATTTAACAAGAAAGGCCTTGTGCGCTTCAATATGAACAGTGTTAACGGACCGCAGGGGTATGAGCATAATGCTTTCAGAATCATGACACAAATTCCTTATGTGCCAGAACTGTTAGCCGCAAGGGGTCAATTGCGTAAAGACCCTTATGCGCCATTCAATCTACCCCCAGTACGACGGTTGGCTACCCTCCCCCGCTGGATACAGGATCGGGTTCCGAATGCCTTCGCCCGCGCGAACCCTCAAGCCGCTAAAATGCTCCTACGAAGAGGAGTACATATTAGCTACCCGGTACAATTCGGGGGCGCCGCCGTGATGTCCGTCGATTCCATAAAGGGAATGACAAAACGACATCTCAAAGGCGCTTATGCGCTTGGCCGGTACATTCTAGCAAATCCATCGTCCTACACAAGGATGAGTCGTCTCTTGACGACACAAGCCACACACAAACGTGTAACCGTCACCCCTGTAGCAATCACGGTAGAAAAGGTTCTAGAGGATATTCCGACCGTACCAAAAGGAACAGGTTGCGATATGAAGCTAACACACGAGGCAGTTCGAGCTATAACGAATGACGCGCTCGTTCTGTTTGAGTTCGCGAAGAGTGCTCAAACAAAAGATCGCATCACGTATAACTTCGAAAAGTCCGCGCATATGGCTGCATGCTCGCACCCGTCCATGGTACTAGAAAGCTTTGCTAACAAAGCCAGGAAACTAAAAACTCCTCGCCCAGAGACCGTCTACAAATTATGGCGATCTCTTCGGGAGCCCAATACCGACTACGAGCCCGAGGCCCTAAAAGACCTCTGGAGACTCGACCGAGCAACTGGCGCGACAATTGTGCCAACGGCTTCAACAAACAAAATTGAAGCTATAAGGCTCGGGAAATATCAGTCGCTTCGCGTCTCAAGCGCGCAAATGTCGAAAGAAATTTCTGGCAACCGAGATGTCAGCTCTTCCCTTAGTCTATTTGGGAAGATTGCCATGATATTAGCTGGAAACCTTGAGCAAGCTCAAGTCCAGCAAATCTCACGACAACTGACTAGGCTCCAAAGACGTGCTGTTCGTCTTGGGAGGAAGGTGCGTGTAAACGCCCTTACGAAGAACCCTTAAACGGGTTTTTCCCCCGACTACGAGCCCGAGGCCCTA
>cambTR61500_c0_g1_i1
GTCTTTCCACGCTCGTCTGATACTAATCTTATCGCCTAGAAGGTACGAATCGCTTCTGCGATAAGGTCAAGAGTATGATAAACTTCTGAAGTAGGAGGAGAAGTATCATTCTTCCAACCGGCACGACGGAGTCCAGCACTGTACCGCTCCATCGTTACAGCTCTGTCGCATACGACAGAATTGAGTAAAGACTCGATATAGCCGGGTATCGCGCAGTTCCGCTTGGGGTACTTAGCCCAGCGTTGTCGCCGACGGAATGATTCATCGTCGGTGGAAGATGGGTCTTGACTTTTTGGACTACTTGTCGCTTTAGTATCCTTCCCAGTCTTTGACTGGGGGTGCTTCTTCAGATTGATTTTACAATCTGGGCTCTTCTGAGCCTTCGTATTCTTTCTCCCGGTAGCCTTATCAATGAAAGAACATTGTTGGCTCTTGTGAGCGACGTTACTACCTTTCGGGGAGAGAATGGGTCCCGTGGATTCTGGACGCTTGGTCACAGTAGATTTTCCGCGAGATTTCACCTCAGATATCTCGGTACATGGGTGGGCTGAGCCCAGCCCAGCTCTGCCAACCTGGGTCGCTGATTGGGGAGGAGATAAGCTCTGGCACTTTTCAAAGTACTTGCTTATTGTTGTACCGAGAGATATGACACTAGAAGATGTACTACTTCGGTCATTCTTATCCTTCTCTCGAGAGACCAGTAAATCAAGGACATCGCGTTGATGCTTGATAGTCTCGCTCTGCTCACAGGTAAGCCGCATTATTGTAGCGTGCTGTTCGGTGATTAAGACCATCTGCTTATCGATGGTAGACCGTAAATCCTGGATCAGTGAGAGTAGGAATTGGGTTGAGGTGGGATCCAAGGCCCCACGTGAAGCTAACGTGGAGGTGAGATCCTGTGTGCTGGATGGAGGACCAGCCTGTTCAGTGGAACGGCTGTCCTGAGTGACGGATTCGTCACTACGCTCTAAATTCTGAAAGATTTTACTCAATCCTTCAGATGGCGGGTAGGAATGTCCATCTACCGTAATTGAATTCAATCTGGCTGCGCGTATCCAGATATTGCCTGACCGAATAGCTCCTCGTCTACTGACTTGGTGGATATCGAAAATGCGACCTTTGCTTGTGTAGGTTCCAAGTACTACTACTCTATCTGGTGACGGTTGTGGCGTTGGTACTGTACTACTACTGATAGATTCCTCCGTCAGGGAAGACTGATCGGTGTGAAGCCCTTCGGCAGACATGCTTGATGCACGTAATGTTATTAAATCGTTACTACGAATATAAACCATAACAAGTTGTAAAC
>cambTR71797_c0_g1_i2
TCATACTTTCCGACGAGATACTGGTTTAAAACTTCCTTCGCCCACCGGTAACACTGTTAAACATTATATACCACGTTCATGGTATTACAGTGTTATTGATACAATTAATGGCCGCAAGCGTGTACTTAGTGTTCCGCCATACCTACCACACATTAGTGGCAATTTTAACACTGACCTTGGTCTCTATACTGGTATTTCTGAGGGACACGCAATTTCTATAGACTCAAAGAAACATTCTGTAAATCTTACTAATGTACAGTTATCCCTCACATCACCATTCCTTTTATATCACTTCGACACACTTTTGTACTCGGGTTTTGTACAACCTTACTCATCACTATTAATTGCCGGGATAACTGATACCACATTATGTCCTAATGGTGATTACACACGACTATATATGATTGTACCTTCTACCGTTATATCAAACTTTTCCATACCTATCATCATTTCTGACATACCTTTGAAAGTTGGTCAAAGCACTTACAGAGCAGTAGATTTTATATCCAGGACTCCCATCACTTACGCATCACTATCATTAACGTTGAGGAACATGTATATCGGTGCACTCGACATTAATGTTTTCATTTGCAATCTTCCTCTATCAACACTCTATCGCGCTACCGCCGTGATCTCCTGTAACACCATATGTCAATCTACCAATGCTTCAAGATCTCTTTCCCGTTCTACATTCCGTTCTCAGCGCGAATACGTCGGCGACCATTATTTTCACACGACTAACGCTTACTATACATCACAAGGTTTATTCGAACCCTCGATGGTAGGTCCTATCGAAATCACTCCTTATTCTGCTGGAACATGTACCGTTGGTTATGATTACAACGGTGGTCTACTTATGATTGACTTCGCTGACGTTAACGCACACTACGTTACTCATCGCCTCGATAATCAAGACTTTAGAATATCCACCTCTTCACATAAAATCTTCATTAAACCTACAGCAACAACATGTACTGGTCGTACATTTATCAGTGACGAAACTGCATTGCTTACCTGTGACAGTGATTGCTGTTTAACAACTTTTGATGAATTTCGCGAATTCTCACTCATCAAATCGGGTGATGTCGTTAAATTCCCTGGTACCTCTCGCGCGTTAACGTTATCTCAATATTTCGCCTCTGGAACGCAGCGTAATGTATTTTGCCCAGCATCAGGATGCTCCTATTCCACAATTCATGAAGTATATTCTTGTGCACTCAAGACACATCCTGGCTCTACAATAATGTTATTCTATTTCATTCCTATATTTGCTGGATTTCTACTCTTCATCTACCTGTTTCGTTACGTGCTCAAAGGATTACTATATGGTTTTTCATCATTAAAATTCCTTAATCCATCCTTTTACGCAGACAAGATATACAATCCGGCTAGGTCGTTAGTGTCCGACATCAACACCAACACCTTCAGACGCATCCCTAAGATTGCATTCGGGAAAAATGCATAAATTCATCATTATTATCTTCTTACTTCCACATATACATTCTTTCAATATTATAACTAGAATTGTAAACGGTTCACCATCAAACGATCCATTCACTCACCCTTTATTTTATCAAGGATCTTTCATTTGCACCGCCGTTGCAATATCTCCTACAAAAGCATTAACCGCTGCACATTGTACATATGGTTATAGTAATTACTTTTATGTCTCCCAACTAGCAGTACTATCTTTTATCACACACCCGAAATTTGATCCTGACACTTTAATGAATGACATATCATTACTACATGTATCTTCCTTTGACACATATGTAAATATATATCAACATATTCCACCATATAATTCAGATGTAT
>cambTR75481_c0_g1_i1
GAGGATGATGGGTTAGGTCCAGCCTGGTCTTAGGACCGAAGGATCCTGATGATTCGGTCTGGCAGCCGATGAAAACCCTGAGGGGGGTAAAATATTCTTTCCCGAGGGAAAAATATCAATTCCCCTCCTGGATTTCAAGGCCTGCCAAGGCCTATCATCAGTGTCCTTTGTACAAAAGTACGGGCTGGACATATCCGAAATCACCGAGGAGAAGCCAACAGGTCCATTGCCGACTTGCCGCTGTGAAGCATCGATCCCTTTTCTTCCATTGCCGCGGTGGAGAGTGCTCTTGGACTGGCTAGGTACTTACCTAATATAATATATGGGCGAAGCCCTAAAATATGTTTGTAAGTATACCTCAGCCCAGCAAGACTTCTCCCCAGTGCAGGATAGAACTACTAGGGAGAAAGATGAAACAAGCAGACTGGCGTCAGGATGAGTTTGGTGACCTCTCGAGGATGATGGGTTAGGTCCAGCCTGGTCTTAGGACCGAAGGATCCTGATGATTCGGTCTGGCAGCCGATGAAAACCCTGAGGGGGGTAAAATATTCTTTCCCGAGGGAAAAATATCAATTCCCCTCCTGGATTTCAAGGCCTGCCAAGGCCTATCATCAGTGTCCTTTGTACAAAAGTACGGGCTGGACATATCCGAAATCACCGAGGAGAAGCCAACAGGTCCATTGCCGACTTGCCGCTGTGAAGCATCGATCCCTTTTCTTCCATTGCCGCGGTGGAGAGTGCTCTTGGACTGGCTAGGTACTTACCTAATATAATATATGGGCGAAGCCCTAAAATATGTTTGTAAGTATACCTCAGCCCAGCAAGACTTCTCCCCAGTGCAGGATAGAACTACTAGGGAGAAAGATGAAACAAGCAGACTGGCGTCAGGATGAGTTTGGTGACCTCTCGAGGATGATGGGTTAGGTCCAGC
>cambTR81285_c2_g1_i2
TTTGTATGGCTCAATTATATATATATATTCGTAGATAAGTGTATCTGTGTGTTTTTGTATATATATTTACTATCTGTGTTTGGGTTTTCCTCGTTTTTCTCGATTTTTTTCTTAATTCTTACACAACAGCTAGATTTCCTATTTTCTTCCATTTTCTTTGTGTCTTTTACAGCTTTTTGTTTTTATCTTTCATGCTTCTGTGTGTTTCTGTTCTGTTTTTTTTGTTTCTATCCACGTCTTAAATTTTATTTTCCTTCCATGTGTGTTGCCGTGCTGTTTAAGCCCTTTTGTTTTGGTCTTCTTCTGTGGTGTTCTGTGTTAATTGTATGATGTTATTATGTTCTGTTTTTGTCGCTCTTCTTAGTACTGGCATTACACTGTTTTAATGTTTCTTTTACTGTACTTTTCTAATGAGTTTCTTTCTTTTCTTGTCGGTTAGAAAAAGTTGCTCATCGGTTGGCGAATGACATACGATGATGTGGAAACAAATACGACAACCAAGATGAACGTAGAAGTGCCTGCTTTACATTAGCTTTCATGTACACCCACTGACGGATACAATTTTACTATTTTTATCATGATTTGTTCTGACAAATGTTTAGTATGCTCTACAACAATTCAGCTTAAGGTGTTCTTTTCTTTTTAAAGAAACACATTTTACATCAAACAGAACTAGGCTACAAACAACACAAACAAGGTAAGGGTATACGTCGATGCTGGATTAATGCGGATTCATGCAAATCGTTACAGTGTGCCACGTACGACAATTTTCCTCCTCACCATTTAATATGTACGCCATTTATTGGACGGTTTCTGAGTTGTGTGAGTGAGATAGTAAGAGTGGTCTGTCTGTCTGTCTGTATGTGGTGGTATTGGTATTACCGGGACCTTCACTGGCAACCGTCGACGACTACTTTGATTTTACACCTCATACACTTACGGGCCGGGTGTAACTTGTCAAACTGACAGCTGACGGGTGTCCGCTGTGAGACAAAGCAAAACTACACCAACGCCCATCCAAACCGATCCAAGTAGGTTAAGCGGAGCCAGTGCCTACAACAGGTGACGGTGATATTTTCCTTCCTCTTTTCATATAATATCCACCATTGGACGCCTTCTTGCCGTTTGTAAGTTTTATTTTCAAGGATGAAATAATGTTTCTTTTATTTGCGCTCAATATCAGCATGGATCTAAAACAAAAGAGGAGAAAGAAAATAAATAAACAAAAAAACAACACCACTAAAGGAAAGGAAAATAAAATGAAGACTAAAAGCACTACTACGCTACACTCCTCTCACCTAAACTGACCGTACGCCATTGACAGTAGATTTTTGTTGCTTTAGATCGTTTGTCAGGGACACGCTCTCATCTACATGCATACACGGCAGAAAAACAAAATGCAAAAGTAATTAGTTGCTTTTTTGTTCTCTTTGCTTATTAATAATTGTGTGCTGATACCACACATGCTTCCTTTTGCGTTTACACGTGTGTTTTACACTGTTGGTGCGTACAAACTTATCTTATACGCACCCGTACACGCGTACGCATGGTATATGGACACATTCTTTGAGTACAAGATTTGTTTTTGCATTTTTGTTTTGCTTAGCCGGTTTTTCATTTGTTTTACACATTTTGCGCTAAAGTAAGCCCCTACCGTTAATACGATATGTTAGGTGTGTGTGTCTGTGTATGAGTGAGTGTGTGTGTGTAAGTGTTTTAGGCAAGGAAATGGGGACAGTTTTGGACAGCATGGAAGGGAACGGAATTGCATGCGGATGGGGGTTGGGAGTTTACAGTGCTACCGAGCGCATAATTACAATGCCACTACCAATACACTACCGTTTGACAGCTGCCATTTTCTTAGTGTCATTGTCACTTCCTCCTTGCGAGATATTCTCAAAAAAAAAAACGTTCCACACTTTCGGCAAAAGTGGGACAATCGTTCGATTCCACTTCCACTTGTTTTTGGGCTTCTTTTTATCAACGCTTCTTTATTTCATTTACAATACTTCCGTTTCCGTTTTGCGCGCCG
>cambTR82121_c0_g1_i1
CTATCAACGATGATATTCGTAATATAGAGGTCCATCCTTCTATTGACGTCCCCACAGAAATCACTCATGGTGATTTAACTTTATCTATCTCTCCCGCAGGCACAATTATTTCACCTCTCGCAGGATCCTATTATCTTGCACACTTTCAACGTAAAGAAATGTTTGATACCATTGAAAATGCCAAATGGTACAAAGCAAATACAGTTCCTACTATTTCTTCAATTTCTGAAACTATTACGAAATATCATTCACCAAATTTATTCCCAACACAGTCTTACAAACCTGATTCGGAAACAATGCAGCAATTTTACTTTGATAAACTTCTACTACAGGGAGTCAACGTTGTAAAATGTGGAACTTCTTTTGATCAACAATCTACTGCTAAAAACTCTGTTGAAAGAAAACTCATGAAATTGCGAGCTGATTCAGCAGTCGAACCAACAACTACTAAAATGGACTCTATTATTTCGTATTTACCTACACTTTCAAACCCAAATCCACCAACCACTAAAACTTA
>cambTR82696_c0_g1_i1
CTCCTTGTTAACCCAGCCTCCACCTGATACTGCTGATACCGAAAAACGTGATGAAGTGCCAATTCAAGCGACACCCGACGTCGTACTAACTGACGTAGTCGGTGATTACGCATATTACGTTCCATGTGATCAAGATCCTGATGATAAAACCTCTCTAAGCGTGATAAATGAAGATAGTGAAAATAGTGTATCTGACGACAGTCTTTCCGGTGGGAGTTCCAGATTTAAACGTTACATGCATAAGTATAACGGAGATAAGCGATGGCGTGATTTCATACGAAATTTCATTAGTGACCGAATCACCCCTGACAACGCATTCAAGATGATGACACGTAACAAATTGCCATCCCACGCGCTCGTTGTAGGTCCTGTTACATTAAAATCTTCCACAGACAATTGTGAAATTGATCACCATCAACAACTACCATTAGTAAAACAATACCCCTTGGTTTTATTATTTGATGATGTTTATCACGTCGACGATGATCTACGCGCAGGTTTAAATATACCCACTTTAACGAATCTTATTGGTAAACTGCCGTTGATCATGACTAAACAGGGGTCTTTGTTCATGAGAGTGTTTATTGGTCTTGACAACACATACGACACAATCCTAACAATGTTGTCGTCGTATTTCGCAGATGTCAAACTCGTGAAACATGGCGACTCGCTGTTCAGTTCCGAATATATTTTCATTGGCGATAATTATAATATCGAACAGCGCAATGAACATACTATTGACATTGCATCTTCGATTGAGACACAAGCGTTAATAATAGATTCGTTGAGCAAAATTTTCGATCACAAACCCGACATTAAAGTAACGACTAAAAAATGTCCTATTGGTG
>cambTR85209_c0_g1_i1
GCCACGATCGTATAGATTGGCCAAAACTGTATCATCAAAATTTCCACGCGCAACATCATACCGGGGAAATATCTCTCTTAGCTGAGCGTTCGTCACGGACAGGAATATGTGTAAGAAGATTAGGGTCAGAATCGACAGCATGTCTAATGCGTAGGAAATAAATCCACTTGTCAAGTAAAGTGATAAAAAGATAGATTAAACCGACTGGATAGATCGGATAGCCGATAGCGATGATAAGTGATATAAGCGATTGAAAAATACAAGCGAAAACAGATGTTTTGCAGATGAATGAAGTATCAGTTTGGGTATATACAACACCACGCCAAGTTATTCGACCGTCGCCTATATATTGTGGTGGTGGATACGCCCAAACGAGTATAAGAATGTTAGTGAGAATGAGTATGAGAATCCAGCAAGAGGTAGAGAATTCTTTAATAAGATATTGTCTTAATCTTGGTAGAGTCATTTTATGTTGAATGATAAGATAGTAATGTAAATAGGAATTACGCAAAGCACCTATTTATTGTAATAAAATATAAATTCGTGGAATTACGCTTAGCACCACGAATATTTGAGAAGTGTATTTCCACGATCTTCTCCACCTTATCCCGGGTGTGGTCGGTAAAGAACATTTTATGATTTTA
>cambTR880_c0_g1_i1
AGGGTTCTTCGTAAGGGCGTTTACACGCACCTTCCTCCCAAGACGAACAGCACGTCTTTGGAGCCTAGTCAGTTGTCGTGAGATTTGCTGGACTTGAGCTTGCTCAAGGTTTCCAGCTAATATCATGGCAATCTTCCCAAATAGACTAAGGGAAGAGCTGACATCTCGGTTGCCAGAAATTTCTTTCGACATTTGCGCGCTTGAGACGCGAAGCGACTGATATTTCCCGAGCCTTATAGCTTCAATTTTGTTTGTTGAAGCCGTTGGCACAATTGTCGCGCCAGTTGCTCGGTCGAGTCTCCAGAGGTCTTTTAGGGCCTCGGGCTCGTAGTCGGTATTGGGCTCCCGAAGAGATCGCCATAATTTGTAGACGGTCTCTGGGCGAGGAGTTTTTAGTTTCCTGGCTTTGTTAGCAAAGCTTTCTAGTACCATGGACGGGTGCGAGCATGCAGCCATATGCGCGGACTTTTCGAAGTTATACGTGATGCGATCTTTTGTTTGAGCACTCTTCGCGAACTCAAACAGAACGAGCGCGTCATTCGTTATAGCTCGAACTGCCTCGTGTGTTAGCTTCATATCACAACCTGTTCCTTTTGGTACGGTCGGAATATCCTCTAGAACCTTTTCTACCGTGATTGCTACAGGGGTGACGGTTACACGTTTGTGTGTGGCTTGTGTCGTCAAGAGACGACTCATCCTTGTGTAGGACGATGGATTTGCTAGAATGTACCGGCCAAGCGCATAAGCGCCTTTGAGATGTCGTTTTGTCATTCCCTTTATGGAATCGACGGACATCACGGCGGCGCCCCCGAATTGTACCGGGTAGCTAATATGTACTCCTCTTCGTAGGAGCATTTTAGCGGCTTGAGGGTTCGCGCGGGCGAAGGCATTCGGAACCCGATCCTGTATCCAGCGGGGGAGGGTAGCCAACCGTCGTACTGGGGGTAGATTGAATGGCGCATAAGGGTCTTTACGCAATTGACCCCTTGCGGCTAACAGTTCTGGCACATAAGGAATTTGTGTCATGATTCTGAAAGCATTATGCTCATACCCCTGCGGTCCGTTAACACTGTTCATATTGAAGCGCACAAGGCCTTTCTTGTTAAATGCCTGTTCAATATGAGCCCAAAGTGTGTTTTCAGTCGACCGCACTTTAGTTTGGAGGTCTTTCCCTACTCGTTTTGCCGGCTTGCCGACAAGTTGTACGACATTCTGTGCGAGGATGCCATACAGACGAGTACGGTGCGTCTTATCTGGGTTAAACTTCAAACCCATTGCCTGCGCAGTCTTAACATAATCTGCATACTCTTCCTGAGTCGCGTATATTAATGCATCGTCCCCGACGATGTGCGACCGTTCGAGTAGACCGGCATGCTTTAGAGCCGTCAATTGCAGTATTGTTAGGATAGGCCAGGTCAAGGGCTTGCCCATGAGCACACCTTTCTTCATTGGGAAAGACAAAAATGGCTCTCTTGAGTTCTGATGACACACTGCCATAGTTTGCATCTGTGGTAACTGGTCCCAGAACACTGACTCTGCTGCTGTAAACCCTTGATTTACCATTTCGGCAATCAAGTCCTCAACTGCACTCATGGCATAGGAGGAATCGATATGATCGGTTGCAGCAGACAGGTCCGTAGAGTATAGCCAGCGGCGTTTATGGTCATTTTTAAATTCAGCGAGGAACTCCTTGGTTGTTCCTATCCCTAGGGATGTTTGAGCTGGATAGGCCTTTGAAAGAGCCCGAAGCAGTAATTGATTTACTACTCGGCCGGCCGTGACCATTGATGAGCAAGGCGGGATAGAAGCAAGACGGACCTTGTACCCTGGCTCTGGCAGGTATAAGGCTTTGTTTATCCGTGGCTTCGACTCTACGGTACGTACATTACCAATAAATGTATCGTACTGCCCGTTGCTCTTTTCAGCGGCATCTGCAATACACCGACTAGTAGTAATTTCACTATCGGTGGCAGAACTGACGATCTTAGAATCAGTTGGGAGGGGTATCTTCTTCCCTTCTACCTTGATAAACCGTTTGATACGGTTGCTGATACTAAGCATGGTCGCACCAATTGATTGGTGGATCCCCGTGTCTTCCTTTGGGATGAAAGTCGGGCGACCAGTAAGCCGCTCCTGCAACTTTTTAGCTTCTGCCTCAACGATTGGTTCGGTGAGGAGAGGTGCAGGCAAAATACGTGCAGAAAGACCTAAGGCGATTCCTTCACGGAACGACACTAGGCCTGAGGAACGGATGAGGGATGCAAACAGGCTTGATGCCTGACGCGACGAACGCGTTCCCATGAGTTTCTTTACTCGTTGTCTATCCTTCCTCACACGTTTAATTTTTCGTTTTGACGCTGCCGCAAGCGCACTGCGAGTGAAACATTGTTCGAACTCGCTGTCCCCTGTAGCGTTTTTCGCTTCGTCACCGGCTTGTAGTGACCGATCGAGTAACCTAAAGCAGTTCTCTTTCCACCACGACGCGACATTTTTAACCTCGTTCTTAGCGAGGAACGCGTATAGCCGGGCCATTGTCTTCAAGTGCGTTAAAACATCATCGCCTCGAAGTTGACGAAGATGAGTTCTGATTGCGAGTGCAAATGCACTGTCTGCAAAACGGACGAAGTCAGATAACCATTGCTGGTCCTGCTCGTCACGTTGCCGCAATCGCCGTTCAGACCGAGATATAGACAGCATAAGGCTGCCTGGGGCGAGGTTCCGCTGAACCATACGCCGCAGGATGGCTGCAGTCATGCCCATAGAATAAATTCTGGGCCTAACCACGATGTTGTTGCCAGTTGGTGACACCATCCCCCCTGTAGCGTTTTTCGCTTCG
>cambTR90729_c0_g1_i1
GTGGTGCTAAGCGTAATTCCACGAATTTATATTTTATTACAATAAATAGGTGCTTTGCGTAATTCCTATTTACATTACTATCTTATCATTCAACATAAAATGACTCTACCAAGATTAAGACAATATCTTATTAAAGAATTCTCTACCTCTTGCTGGATTCTCATACTCATTCTCACTAACATTCTTATACTCGTTTGGGCGTATCCACCACCACAATATATAGGCGACGGTCGAATAACTTGGCGTGGTGTTGTATATACCCAAACTGATACTTCATTCATCTGCAAAACATCTGTTTTCGCTTGTATTTTTCAATCGCTTATATCACTTATCATCGCTATCGGCTATCCGATCTATCCAGTCGGTTTAATCTATCTTTTTATCACTTTACTTGACAAGTGGATTTATTTCCTACGCATTAGACATGCTGTCGATTCTGACCCTAATCTTCTTACACATATTCCTGTCCGTGACGAACGCTCAGCTAAGAGAGATATTTCCCCG
>dakTR18574_c0_g1_i1
CCCTCAATGTTTTATGTCCCGAGGGGTTTGGCGAAACAAACAAATTCAACGTCACTGGTTACCAAGTCAGCGCGTAGTATGGAAAATGTTTGCCATTGTAGCCAATCAAAGAAAGCTTCAGGTAAGCATATCAAAAGACGAAGTCTCGTCTACCTGAGCAGCCGCCAAAGCTGGAAGAAGGTCAGTTCTTCCGTAGTGCACAAGCATCTCCTTCGCAACCCGAAAAGGAATCTTTCGTAAGTCGAGGTCCTCCTCCACTTCAAACCGATGGTCAAACCACTTCACAGTAGATTTTCCAGCGTCCGTCGTGAGGATGGTAGAGGTGTAGTTCGACTCACCATCATTCGCTATTTCATGCCTGGTTTTCAGCTCAGCTGGGTCATAGAGATGAAGGTTCCCACGCATGTGAATTTCAAATAGCGACTTATTTGGCGCATAGTTAGTGCTAACCGTCGCCTCCTTTTCAGCGAGATCTGAGAACGCAACAGCCAATGCACAGCTCGGATAGGTGTTGATGAAGTTATTAACTCCGGCGTCCCATCTAGCCCTAACACTGTGCGGCTTTGGTGGTACGTTCAAGCGAAGCTTGAGCGGCTTAGTTACCTGTGCCATTCTGGCGCGCGGGTTCTTGATTATGTCGTCGTAGTCATAGGCGTACCGGCCCAGAAGCTCAGTAGCGGTAATGTCACTAGCCATAGCATCAACCCCATCAACTGGAAAGATGCAGGCAGCGTACATACCTCCACGAGAGCCAAGATCGGCTGAAGGAACAATGGTGATGTCAACTGTCGACAGAGCAGCTCGCTCAAATTGGAAAGTTCTGAGCGCGTTGTAGGCAGGAGTGTTATCCGCCTCCATCGGCACTGCAAATGGTGAGTGCGCCGCAAAGTCTCCAGGTCCCAGCAAAATCACCGTTCCAGCTCCAACCGTTAGTGATGCCGCTTTCAAGTCATCGGTAACTCCTGTAGCGAGTTTGATGATCTTGAGGGCAATAGAGGCGTACCATCCGAGTGTCGAAAGCCATGAAGCGTCCTTAACATTCGGATACAGCACCAATCTGCGATGAACTGTGGAAGAAGTCCCAGTCCTAACAGAACCCCTAGCAGCAGTACGACGGCGACCAGCGCGCTTAACAGCTGGCTTGCGCTTTGAAGAAAGCTTTCCCCGTGGCATGTCGGAAGACAAACTGTTCGATTCGAATGTTGTAGGTAATCAAAAATGTGTTGGGTACACTCGAGAACAGTATCACACATGGAAATGAATTCTTGGAAAAAGATTTAAAACGTTAACCGTTTCTTCGTCTATTC
>dakTR35813_c0_g1_i1
TAAAACACTTGCTTAGCCCCACTTATTATTTATAGACGAAAGGGGATACTGTCTCAGCTAAAATAGTAGGCTGTTAGAAGGTGAAACTAAGGAACTGAGGTCTAACTGTTATTTAACGTTTAACTCTCTATTCTACTCACTCTCTCCACACAACAGCCCACACAGAAAGCTGCTCCCTAACGGGCTAGCAAAACGGGAAGCATAGGGGGTAACCAGGGGGGGAACTAGCAGGGTGCGTCTAAGTAGGTATCCTGATAGGATACGTACAGGCGCACCAACAGCTGCACGGGTTGCTTATCTGTGGCGCCCGAACTCACCTGGACCACGGTCTGAACGGTGCTCCCAAGGCCGTAATCAACGCCAGTCGGCGTCGCTATCCGGATCGTAACCGGAATGGAGCCAACCAGGCGGATGGGGGATTGGGACACTCGTTGGCCCGATGCTGCAAAGAGGCTGACGACTACAGAGTGCGGAGCGCTAGAGCAACACTGCACCTCCGCTCTCAGGGCCTTCCATGGTCTATCTTCGACCATACCAAAATCCGTAAAACGGATATTATAGGTCGGTCCAGTGACCTTGGAACAGTAGACGTGAACCAACATTTGGTCGGAGCCCCGCTTTCGCCTATGGTTCCTCATATTGTTC
>dakTR44850_c0_g1_i1
CTCCTGAGTTCTGAATTCACCTAAAATTTCAAACTAGGCCATTTCCCAACTGTAGTGAACCTCAACTTCCCTAACAGCAGCACATTGACCTGACTTAAGTAATTAGACAACACCTGCAACGCTAATTACAGATATTAAACCGGACGTACACCGACAATGAGCACAAACCCTACGAGAAGTAAAATCATAAGCGGACCATCTTTTTAAGAGACACACTCCCCCAGAAGGATTCTTTAGCTGCCAAATTCTTTTAGTTTACACCATGGATTCCAAGTTAACAGACTGAATATGAGGGTATCCAATCCTCCTCTTAAACCAGCCCATTCTAATTCTGCAAGATAATTAACCAGCCAATCTATAAATTCTACCCCCAATTAGCAGATACCTTACAAACCTTTTAAACCAACGTAGAAGAAACCAGTTAAACAGATTAACCGCGGATGCTGGCACTGTGCATTATCCACTACCTTCCAGGACCCCCCTATCGAAGTTACCTTCAAAACAAAGATCTAACCACTAAGACCTAACCTCTTAATCAAGCTAAAATCAGACATAATAAACCTATGAAGCAAGTGTCCCAAAT
>dakTR45055_c7_g1_i4
CCGGTCTTTAGAAGAAGGAGGGGCAAGGACAAGAGGCAAAAACAGCTCGTTTCAACCGATAAATTCGAGAAGAGGGAGTTAGAGCATAAAAAGTGAAAGAGAGGTCATGATTAAATTAACCTCATTGTAACCAGGGTATAGAACGAGTACGGGAGTTTTTTGCGACCAAACTTGAATGTGAGCACAGGCGTTGAAGATGGTAAACCACAGACAGAAAAGCATCGATAGGAACATAAAGATAGCTAGATCACATGAAAGAGAATCGCCGTCGTCAGCATCGCTTCCATCATCCTCGTTGTCGTCAACGTTATTATCGTCCACATCGGTACAGTCAGGGGCTGTTCACATATGCCGAACTCCATCGATCTCTAGGTGTCGAACTTTGTGAATTTCCCGCAACTGGCGAAAAACTGGGCTATCGAACTTTGACAATTCATCGAGCTTTCAATTGTAAAATGTAAATAAATCAATTTTTGATCAAAAAATGTAACGAAAGAAGAAATAAAGGAGAGTGCGATTCCCGGCAAGTTCGGCAGCTTGTATGGGAGATCGATAAGTGGAAACGGGACCTAAGGAGAACAAACAGGGTAACATGTTCAAGCAGCCTTTTTCAATGATTCGATCAAACAAACTTGGCCCATCGCGAGAAATATCGCACTTGCTGAG
>dakTR45055_c7_g3_i3
CCTATCTTCATCTCATCAGCCCAGGCGGATGCATTTCGTCGGCTGTTGTGCAAACGCTCCGTACAATCTGGCTCTCTCGTGCCCAATACGAGCAATTTTCGTCCGGTACAGTCACCGTCAAACTCTTTTCGGCTGGTGTTTGTGCGCGACATTGCTTCACCGGTGCGATCGAAACTGTAAACCATTTCGAGCGAAAGTGTAAGGAAAACGCCAAGCTGCATTTCCGTGTGCTATTATGCGTTGATTTTTTTTTACGTTTTTCTTTTATTGTCGCTTTAAATAATAATTGGATTATAAGCTTGGTTGGGTTTCACATATTACTGATAAGCTCCGATCGAAAAAGCAAACGAATTATTTTGCGCGCTCGTTTCTTCGTTATTTGTAGGTCCCGCTTCCATTTACCGAACTCCATCGATCTCTAGGTGTCGAACTTTGTGAATTTCCCGCAACTGGCGGAAAACTTTGCTATCGAACTTTTACAATTGATCGAGCTTTCAATTGTAAAATGTAAATAAATCAATTTTAGATCAGAAAATGTAGCCAACGAAGAATAAAAGGAGAGTGCGACACCCGGCAAGTTCGGCAGCTTGTATGGGAGATCGATAAGTGGAAACGGGACCTAAGGAGAACAAACAGGGTAACATGTTCAAGCAGCCTTTTTCAATGATTCGATCAAACAAACTTGGCCCATCGCGAGAAATATCGCACTTGCTGAG
>dakTR50770_c0_g1_i1
CCCGTGTCTCATAAATGCCGTATTATCGTAGTAATAAATCGTGTGTGTGTGTGTGTAAAGTTAATTACGCCCTTGTGTTTTATTCCGGCCACCGAGTCTGGATGTAAAACAATTCTATATTACTAAATCATAAGTTCGGATGATATTGAAGTATGTAACTGCCTTCAGCCGTGTAACACCCTAGGCTGTCCTAGATATGATTTTATTTATTCGATGCTTGAAGGTAAAATTGTTTCACATACAACTGTCGCCTCACTACCGGACCGGTCTGAAAAACATTTCACACCGATCTGCTCTGGATCAAATCTTAAGGTTTTGAAGGTACACAAATAGTTTGACCATACGTCTATCTGGATTTTTTTAAACATTGAACGGACATTCCCTATTGATCTAATCCTGAAGAGTGCAAACAGGATAACTTGTACAAGCAACCTTTCTTAGCGATCCACTCAAACAAATTTGGTCCGTCTTGAGAGATATCGCATTTGCTGAGAAGATATTT
>dakTR50770_c0_g1_i2
CCCGTGTCTCATAAATGCCGTATTATCGTAGTAATAAATCGTGTGTGTGTGTGTGTAAAGTTAATTACGCCCTTGTGTTTTATTCCGGCCACCGAGTCTGGATGTAAAACAATTCTATATTACTAAATCATAAGTTCGGATGATATTGAAGTATGTAACTGCCTTCAGCCGTGTAACACCCTAGGCTGTCCTAGATATGATTTTATTTATTCGATGCTTGAAGGTAAAATTGTTTCACATACAACTGTCGCCTCACCACCGGACCGCGCATCAACAACATTATTATCAAAAACAGTGTCCCTTAAAATGTCTGAAAAACATTTCACACCGATCTGCTCTGGATCAAATCTTAAGGTTTTGAAGGTACACAAATAGTTTGACCATACGTCTATCTGGATTTTTTAAAACATTGAACGGACATTCCCTATTGATCTAATCCTGAAGAGTGCAAACAGGATAACTTGTACAAGCAACCTTTCTTAGCGATCCACTCAAACAAATTTGGTCCGTCTTGAGAGATATCGCATTTGCTGAGAAGATATTT
>dakTR62671_c0_g3_i2
TACTTTTGTCTTCATACAGAATAATGTTTAATCTGTCTCAGATTAAACAATGGCAAGTAAATGCTTCAGAAGTCCGAAGTCATTTACTGAAGCACTATCTCTGACCATTCTCTTGCACACGATTTCCCACCAAATAAAACAAGATAGTAGTGCTTGCATTTGGTTCTACTAACTAATGTGCATTTCTGGTAAACGATTTGATGGCATGCTGAAAGCTTTACATCAACAAAACGTTGATCAAATGTTCATGCCAGCGAACGTGTTTGCATCCGATAAAATGGATCGAATACATGTTTTATCGCCTGCAAGATGGAATATTCTTTAGCACCGTTCCGACACCAACAAATGGAAGCGGATCATAAAATCAACAAAAGCTGGTTCTAATTTGATTCGTATTCGTATATACGTACATTACATTTTTAGAGAATTTTTTTATGTTTCAAGAGATTGCTTGCTTGAACAGATTTCTCTGAATGTTTTTTCCATTTTTCTTTTATTTGTGGTATCCAAAAATATTCAGAGAAGAGACAGAGATTTCATAGGAATTTATTGCTAACATGTATGTATACTACGCATTATTGCCCTATTGACATACCTACTATAAATGGTGTCCCGAATTCAAATTTGCAGATTAACAGGCAGATTTTGACAAATTTTTTTACAATTGGGTGATCAACGAATTGTCGAAGCTTCCATGAATTACTAGCGAATTTGTAACACAAACTCTCTCAAAGGCGATCAATTCTATGGTTTTTTGCATGTTATAAACATGTCCGATTAACTCCATTCGTGGAAACAGGTTCCAGCAACGTACTCAACATATGATACGAGTACGTTCGCAAATGAAGAACCATATTTTCTCTACCATAACTGCTCAATAGGTGAAGCAT
>dakTR62671_c0_g3_i3
TACTTTTGTCTTCATACAGAATAATGTTTAATCTGTCTCAGATTAAACAATGGCAAGTAAATGCTTCAGAAGTCCGAAGTCATTTACTGAAGCACTATCTCTGACCATTCTCTTGCACACGATTTCCCACCAAATAAAACAAGATAGTAGTGCTTGCATTTGGTTCTACTAACTAATGTGCATTTCTGGTAAACGATTTGATGGCATTCTGAAAGCTTTACATCAACAAAACGTTGATCAAATGTTCATGCCAGCGAACGTGTTTGCATCCGATAAAATGGATCGAATACATGTTTTATCGCCTGCAAGATGGAATATTCTTTAGCACCGTTCCGACACCAACAAATGAAAGTAGATAAAATCAACATATGCTGGTTCTAATTTAGTGCATATCTTTTAAGTAATTCAAAATAATGCCAAAAATATCGAATACCTTTCTCTTATAACGATCCAATACTTCGCTACACCTCACAACTAAAAACAACAGAATCGTTCGCCATCTTCACACGTACC
>cambTR32510_c0_g1_i1
TGACGGGATACATTTTTAACAAAAGCTATAAAGATCACTGATTCGACCTCGATTTCTTTCTGAACTGGATCGTAGACGGATAATCTTCTGCATCTGCAGTGACCTTCTAAAGTCAGCTGGGGTTTGCAAGTGCTCCGCATCTTTTGTTAAAGAAGCCTATCTAAGTCCTTACTTCAAGCATTGGAAAGCAAAACGTGACCTTACAGAAAATCAGAAGAAATACGTTGATCAGCGCCTCTGGAACAAGTACAAAGAATCAACAGTACTAAAGGTTAGTAGCGTAGAGAAGAGGGCGAGATCAAGGAGGAGGAGAGAGGAAAGGAGAGAGGAGAAGAGAAAGGCCAACGTTACTGATCCGGGGGTACCATACCTGGTTTTATCTAGTTCACCAGATCTAGAGGATTTCCAGGACTGTGAAGAGGAGAGTGATTCGGCTGAATTCTCAAGTCAATCAGAAGACCAAGTGACAATTGGCAAGATGACATCTGGAATTGACACAAAGACGATGGAGGCGCTGACTCGGATTATCTCTGATGATTCAGGTCGGCTGTCTGATGATGTGATGTCCCTGTTTGAGGAATGCCTGAAGGTGTTTGAATACAAGGGATTTGACCCAGAAAAGATCCGGAAGGTTCTGGCCATGCGACAGAGCAAGATGAGAGATGGCACTGTCATCGAGCTAGGCTCTGATCGGAGCATCACCATAGCTGGACCAAAAGGTCTCAACAATTTGGTGGGCCTGCTACTGACCCTGTTCAACTTGCGCGGCAACAACCTGGAGTCGATCAAGGATGGCCTGGAGGGAAGGACCAAGACCTCCTTCGAAGCAGTGGTTTCGGCTCTTGATCTGAAATCGAAGGTGATTGTCCAGGGGAAGCCAAAAAGCTCGGAGACTTTGACTCTCTCCCGAATCTCAGCTGCATTCCCGCTCCACTCTTTGACTGTGGTCCGCAACAACAAGTTTGATCGGAAGATCATCGACCTCACCGACATTGGAGTCGATGATAGCGAGTTGGGAAGATGCTTCCAACACCCGGTATGCGCTAGCACTTTGACCGGTGCAATGATAGAGGATGGATGTCAAGCAGTCACATTCTTGGCATCTCTTCGGCTCAATGCCATCATAGGGGCGAATCAGAAGACCACCCCTGAGCGCCTATGGCTCTACCATCTAGCCATCTTGGCTTCAAAGGCAGTTCCGGAGACTCGCAAACAGGCCTACTGGAAGAGCCTATATGAGGCCACTATAGTCCGAGAGTGGGTAGCGCAAGCCAAGAAGATCCTGAAGAAGGACCTTCCTGAGACGCTCTACGATAGTGTGAACAACTATCGCCGGCTGTAAACACCAGTCAAGGTTCACGGGCAAGCCTCAAGTTGTCTGAATTTTCCCTTTCTATTCTTTAGAGGTCAATGAGACCTCATGGTTTTATAGGGGAGGTTCCATGCAAAAACCAAACCATTCATATCACAATGACCGAACAACAGGCAGTATCCACCTTTTTAGCTGGTACTTTGACTTTATTTTCTTCTTTCAATTTCCTTTAAGCCATTATTTTAGTTTGGGGTGCAAGCAACAACCTATGAACTTTGCTTCTGAGTTGTTGTTTGTATCCCGG
>cambTR57699_c0_g1_i1
GGTTATGGTTGCGCGAATCGATAAACGAATGGATGAAAATTATACACTTGTCCTTGGGCTGCTGTTCTTCTTCGAAGGTTGTTTGCCAACGGGAAAATCAAATAATTTTCCCTTGTCGAATGCACAAGCACGGTTCGGTGGGGTGGGGTAACGCACACACGGTGCTGTAGTTCTAACGCACAATCGCGGCTTACGCTTTCTGCTTGCTACACAACTTGTACAGTAACTTTCTCTAAGCAATTCGGTTGAACTAGATCGATCAGTTAGGTCACGTAAAGTACCGTAACAAAGCGACGAAAACCTGATCAAAAGTTGAGCACAACAAACACACTCGATAGAAAATAAAGCAACACACTGCACTGCTTACGTGCGGTGTAACGGCAGTAACGCACGTACGGTCGCTGCAGCTGTATTCTCGACGATGTTGTTGATTAAAACACGTTATTAAAACTTTCTTCTGATATATTACCACACTTGGTTGAAAAAATCTTTTCTTCCAATCTTAACTCCGCAACATAAACTTCTCGCTGAACCAAACGGGCAGAGTTCACAACGTTACGAGGCCAACCTTTCGTCGGAACTGAGGCCATGATTAAGAGGGACGGCCGGGGGCATTCGTATTGCGCCG
>cambTR62681_c0_g1_i1
ATCCAGTGAAACTGCCCATTAACTGAACAAGTGAGATCGCAGAGCTACCAGCCGGCTGCAGAACAGTTGACAGGTGGTTCACATTTCCTCGTCCAATAGTGGTGTTGGTGTTGCTCGACAGCACACGAACCGACCGGATTTTGGTGATAGAAACTGGCTGCGGATCTATTAAGTACATTTTGTCTGGCCTGACAGCCTTGCTGGACGGAACATCAACGGACGGAATGTCGGTTGTAACAGCTGGCGGCGGAGCACCCGGTACCGGTTACAGTTCCTGGCTGCATAAAAATGCTGCTGTCGGTAGTTGAAACAGCACTGGCGAAGGGTATCCACGTTTCTGCTGCATCAGGACGAGAACAACCCGACAAACAGCTAAACAAACGTTGTTGTTTCGGTGGAGTAAACATTTTGATGATGCTGTAAGTATGAACGATTATGTTTTGAAATCATTGTTTTTGCTGCTATTATACTTATACTCACTTTTTATGATTTCAGTTACACCGCAACGTGGAAATGTTTCAAAACGTAATAGCAGTTTTACAGTGCTTGAATGTGGAACAAAAAGTGGTTTATTTATGTTTCATATGTTTCAAAATATCAATAAATGACAGTTAAAAACGGAAAATTTCTTTTTATTTTGAATTTTTATATACCTTGATTATGTCGACTGCGAATGTCGACCCTGGTATGTCGCCGGCTGTCAAAAACCTTCTTTTGAGCAGTTGATCGGAGCCCTGAAAAGGAGGTTTTATTTTGTATGGGAGCTCACGCACACAACCAAGTCAGTTCTGGGGCAAATTTGACCGTAGGGACCCCATCACAGGTGTTAAAGTACGGCAAAAGGTGCAGAACTTTAAAAATTAAACCTCG
>dakTR11667_c0_g1_i1
CTCATGTGGGAAGTATCACCGCAAGTTGTCGATGACAACATTGTTTTAAACTTTTTTCTATAATCTTTTTGTCATTAAAAATTAACAACACCAGTTGTGTTACGCTTGGTAGACTGGTTTGTTTACCTTTTCTGTACTAGGTAATATTGGATTGTCAAGCATTGGCGAGGTTGCAACCCAAATTTTTTGGTTGAGCAAGATTTGGTTGCAAACTTTTCCGACAGATGGCGATACCATAGAATCTGCATATTGGCAGTGAAAGTTGGTGCCAACATTGGCAATGTGTGCAAGAACTTTTAGACTCGTCTTCGAACAATGAGGGCTCATTCAGAAAGCGGTAGGTTTGTTCGTTGCTTGTTGATTTCATCAAATGCCGTCGTTGCAGTGAAAGTTGCTGTTCATCGTCTTGAGCTGACACCATGCTTGTTTTCACATATGCACCCAGCAGGACCAGTGCCTCCAACGTGTCATTCTTTTCCAGTTTCAATGGGGAATAAAAGGCCAATTCACTACTCCTCAGTGGGCAAATTAATC
